# Supplementary material for: Preventing chronic disease in patients with low health literacy using eHealth and teamwork in primary healthcare: protocol for a cluster randomised controlled trial
Source: PubMed Central journal article supplement — BMJ Open. 2018 Jun 4;8(6):e023239. doi: 10.1136/bmjopen-2018-023239 (PMC5988137; doi:10.1136/bmjopen-2018-023239), 2018-06-04
Supplement: bmjopen-2018-023239.reviewer_comments.pdf [file bmjopen-2018-023239.reviewer_comments.pdf]

## PEER REVIEW HISTORY

BMJ Open publishes all reviews undertaken for accepted manuscripts. Reviewers are asked to complete a checklist review form (<http://bmjopen.bmj.com/site/about/resources/checklist.pdf>) and are provided with free text boxes to elaborate on their assessment. These free text comments are reproduced below.

## ARTICLE DETAILS

|                            |                                                                                                                                                                                                      |
|----------------------------|------------------------------------------------------------------------------------------------------------------------------------------------------------------------------------------------------|
| <b>TITLE (PROVISIONAL)</b> | Preventing chronic disease in patients with low health literacy using eHealth and teamwork in primary health care: Protocol for a cluster Randomised controlled trial.                               |
| <b>AUTHORS</b>             | Parker, Sharon; Stocks, Nigel; Nutbeam, Don; Thomas, Louise; Denney-Wilson, Elizabeth; Zwar, N; Karnon, Jon; Lloyd, Jane; Noakes, Manny; Liaw, Siaw-Teng; Lau, Annie; Osborne, Richard; Harris, Mark |

This article was not externally reviewed at BMJ Open. Protocols that have been independently assessed prior to submission to BMJ Open are usually fast-tracked to publication on the grounds that further substantial changes will not be possible. This independent assessment will usually be external, independent review for both a substantial grant award from a non-commercial or government funder and ethics approval.
